# Supplementary material for: Fungal Biostarter Effect on the Quality of Dry-Aged Beef
Source: MDPI journal article supplement (doi:10.3390/foods12061330), 2023-03-21
Supplement: s1 [file s1]

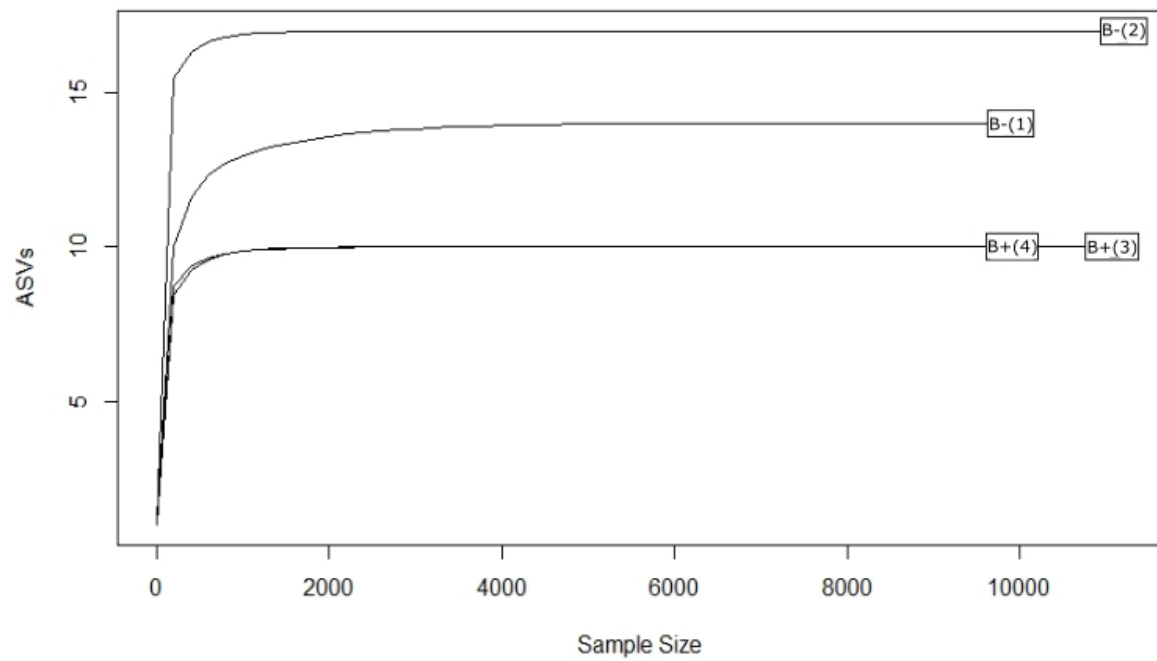

Figure S1. Rarefaction plots of the bacterial communities on the surface of dry-aged beef with respect to samples analyzed (control samples (B-): 1-2, samples inoculated with *M. flavus* biostarter (B+): 3-4. Rarefaction curves display the number of operational taxonomic units (ASVs) detected based on the sampling intensity of the libraries
